# Supplementary material for: Dietary Factors Modulate Iron Uptake in Caco-2 Cells from an Iron Ingot Used as a Home Fortificant to Prevent Iron Deficiency
Source: MDPI journal article supplement (doi:10.3390/nu9091005), 2017-09-12
Supplement: s1 [file s1]

**Table S1.** Running conditions used for ICP-OES

| Analytical Conditions                          | Fe   |
|------------------------------------------------|------|
| RF power (W)                                   | 1200 |
| Plasma gas (L min <sup>-1</sup> )              | 15   |
| Auxiliary gas (L min <sup>-1</sup> )           | 1.50 |
| Speed pump (rpm <sup>1</sup> )                 | 10   |
| Nebulizer gas flow rate (L/min <sup>-1</sup> ) | 1.05 |
| Instrument stabilization (sec)                 | 10   |
| Replicate read time (sec)                      | 5    |

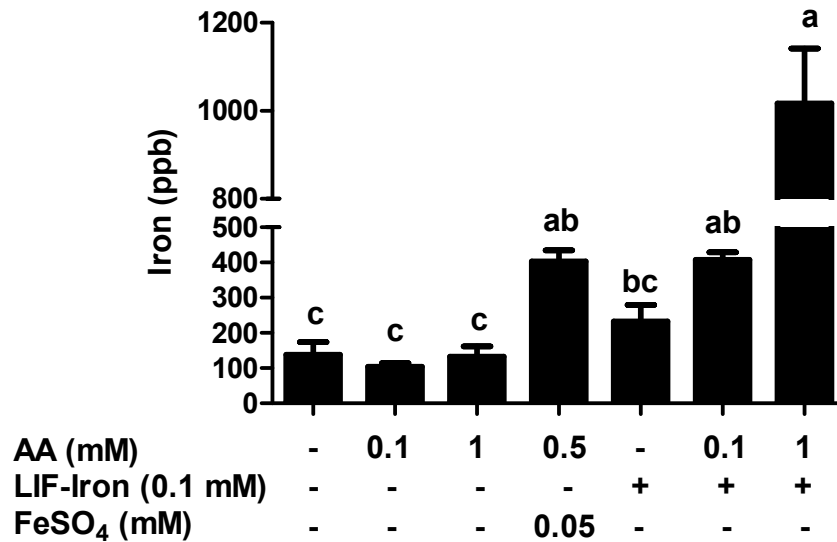

**Supplementary Figure S1.** Iron content in cellular lysates of Caco-2 cells after treatment with the iron ingot (Lucky Iron Fish™ (LIF)) with or without ascorbic acid (AA). Caco-2 cells were exposed for 24 hours to the LIF-iron (0.1 mM Fe) with the indicated concentration of AA. Data represent means ± SEM (n = 4-6). Different letters indicate statistically significant differences (p < 0.05).

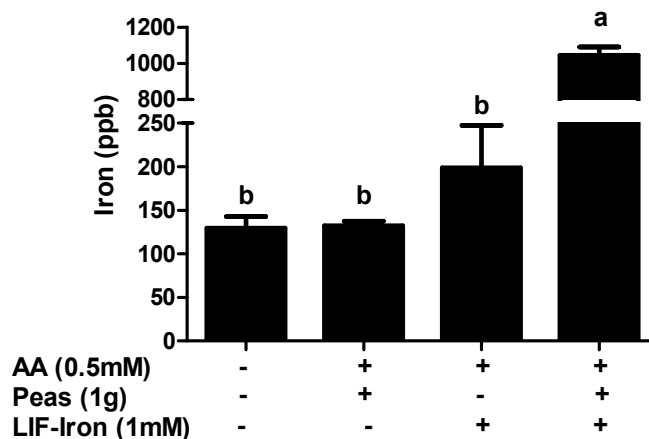

**Supplementary Figure S2.** Iron content in cellular lysates of Caco-2 cells exposed to simulated gastrointestinal digestates of peas combined with the (Lucky Iron Fish™ (LIF))-iron. Caco-2 cells were exposed for 24 hour incubation with the in vitro gastrointestinal digestion containing LIF-iron plus ascorbic acid (0.5 mM) with or without 1g of pea. Data represent means ± SEM (n = 3-4). Means without a common letter differ (p < 0.05).
